# Supplementary material for: Tunable hydrogen evolution activity by modulating polarization states of ferroelectric BaTiO3
Source: Royal Society of Chemistry journal article supplement (doi:10.1039/d2ta07907k), 2023-01-01
Supplement: d2ta07907k1.pdf [file d2ta07907k1.pdf]

# 1 **Supporting Information**

## 2 Tunable Hydrogen Evolution Activity by 3 Modulating Polarization States of Ferroelectric 4 BaTiO<sub>3</sub>

5 Haifa Qiu,<sup>a,b</sup> Tong Yang,<sup>a</sup> Jun Zhou,<sup>c</sup> Ke Yang,<sup>a</sup> Yiran Ying,<sup>a,b</sup> Keda Ding,<sup>a</sup> Ming  
6 Yang<sup>\*a</sup> and Haitao Huang<sup>\*a,b</sup>

7 <sup>a</sup>Department of Applied Physics, Hong Kong Polytechnic University, Hong Kong  
8 SAR, China

9 <sup>b</sup>Research Institute for Smart Energy, The Hong Kong Polytechnic University, Hung  
10 Hom, Kowloon, Hong Kong, China.

11 <sup>c</sup>Institute of Materials Research & Engineering, A\*STAR (Agency for Science,  
12 Technology and Research), 2 Fusionopolis Way, Innovis, Singapore 138634,  
13 Singapore.

14 \*E-mail: aphhuang@polyu.edu.hk; kevin.m.yang@polyu.edu.hk

15

1

## 2 **Computational details**

3 First-principles calculations were performed using Vienna Ab-initio Simulation  
4 Package (VASP.5.4.4).<sup>1</sup> Unless otherwise specified, the generalized gradient  
5 approximation (GGA) with the Perdew–Burke–Ernzerhof (PBE) functional was  
6 employed to describe the exchange-correlation effects, with ionic potentials treated by  
7 projector augmented wave (PAW) approximation.<sup>2–4</sup> A cut-off energy of 520 eV was  
8 used in all calculations, together with electronic energy threshold of  $10^{-5}$  eV and force  
9 criteria of 0.015 eV/Å to achieve convergence. The dispersion correction for van der  
10 Waals interaction between adsorbates and the substrates was adopted by using DFT-D3  
11 method from Grimme et al.<sup>5</sup> Prior to surface calculations, bulk BTO with tetragonal  
12 structure bulk was relaxed. Both BTO (001) and (010) surfaces were modeled using  
13  $2 \times 2$  slabs with three Pt layers as electron reservoir. Apart from the Pt layers, the TiO<sub>2</sub>-  
14 terminated slabs contain 11 atomic layers. The Pt layers were relaxed before they were  
15 fixed upon adsorption of hydrogen. An  $8 \times 8 \times 8$  and  $4 \times 4 \times 1$  Monkhorst-Pack  $k$ -  
16 point meshes were used for the integration in the Brillouin zone for BTO bulk and slab  
17 supercells, respectively.<sup>6</sup> A vacuum layer with the thickness of 15 Å was applied for all  
18 slabs to avoid spurious interactions. Dipole correction was considered throughout the  
19 slab calculations. The polarization of BTO bulk and slab was calculated based on the  
20 Berry phase method.<sup>7</sup> Apart from considering the polarization change from counterpart  
21 electronic redistribution in the slab, the slab BTO was treated as supercell only  
22 consisting of oxide atomic layers, excluding the bottom TiO<sub>2</sub> layer for stoichiometry  
23 sake, when calculating polarization by the method reported.<sup>8–9</sup> To appropriately  
24 describe the strong correlation between  $d$  electrons, on-site Coulomb repulsion  $U$  ( $U_{\text{eff}}$   
25 = 6 eV) for the Ti  $3d$  electrons was included to evaluate the electronic structure based  
26 on Dudarev method.<sup>10</sup>

27

28 The reaction equations involved in HER are given as follows:

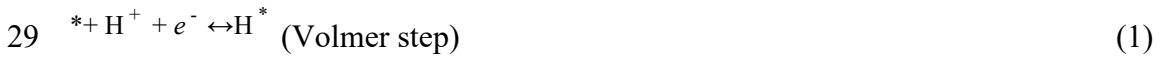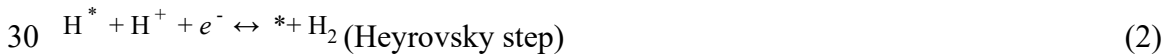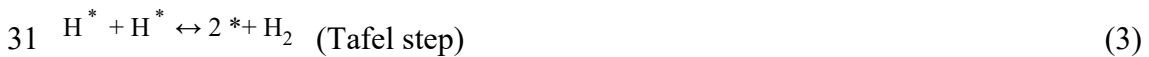

32 where  $*$  denotes the surface catalytic site and  $\text{H}^*$  denotes the H atom adsorbed on the  
33 surface catalytic site. Since the formation of gaseous hydrogen ( $2\text{H}^+ + 2e^- \leftrightarrow \text{H}_2$ ) is at  
34 equilibrium state at standard condition (1atm, 298.15 K), the free energy of proton and

1 electron,  $G(\text{H}^+ + e^-)$ , can be simplified by  $\frac{1}{2}G(\text{H}_2)$  based on the computational hydrogen  
 2 model.<sup>11,12</sup> Thus, the free energy change of hydrogen adsorption for Volmer step can  
 3 be derived as:

$$4 \quad \Delta G_{\text{H}^*} = G_{\text{H}^*} - G_* - \frac{1}{2}G(\text{H}_2) + \Delta G(\text{pH}) \quad (4)$$

5 where  $\Delta G(\text{pH}) = -RT \ln[\text{H}^+] = 0.059 \times \text{pH}$  is used to describe the pH effect from  
 6 solvation.<sup>13</sup>

7 Likewise, the free energy change of hydrogen desorption for Heyrovsky:

$$8 \quad \Delta G_{\text{H}_2} = G_* + \frac{1}{2}G(\text{H}_2) - G_{\text{H}^*} + \Delta G(\text{pH}) \quad (5)$$

9 or for Tafel step:

$$10 \quad \Delta G_{\text{H}_2} = 2 \times (G_* + \frac{1}{2}G(\text{H}_2) - G_{\text{H}^*}) \quad (6)$$

11 The HER activity of BTO under different polarization state is mainly described by  
 12 the Gibbs free energy change of hydrogen adsorption, while hydrogen adsorption  
 13 strength is described by hydrogen adsorption energy. The hydrogen coverage is defined  
 14 by the number of adsorbed hydrogen,  $n_{\text{H}}$ , over the total number of specific adsorption  
 15 sites(oxygen),  $n_{\text{tot}}$ , on the studied BTO surface on which the adsorption occurs. The  
 16 adsorption energy of hydrogen ( $\Delta E_{\text{ads}}$ ) was calculated based on<sup>14</sup>

$$17 \quad \Delta E_{\text{ads}} = \frac{1}{n_{\text{H}}} (E_{\text{BTO} + n_{\text{H}}\text{H}} - E_{\text{BTO}} - \frac{n_{\text{H}}}{2}E_{\text{H}_2}),$$

18 (7)

19 where  $E_{\text{BTO} + n_{\text{H}}\text{H}}$  and  $E_{\text{BTO}}$  are the energy of the hydrogen-adsorbed final configuration  
 20 and the hydrogen-free initial configuration, respectively. The Gibbs free energy change  
 21 is expressed with respect to the adsorption energy by

$$22 \quad \Delta G_{\text{H}^*} = \Delta E_{\text{ads}} + \frac{1}{n_{\text{H}}} (\Delta E_{\text{ZPE}} + T\Delta S_{\text{H}}), \quad (8)$$

23 where  $\Delta E_{\text{ZPE}} = E_{\text{ZPE}}^{\text{H}^*} - \frac{n_{\text{H}}}{2}E_{\text{ZPE}}^{\text{H}_2}$  and  $\Delta S_{\text{H}} = S_{n_{\text{H}}}^{\circ} - \frac{n_{\text{H}}}{2}S_{\text{H}_2}^{\circ}$  are the change in the zero point  
 24 energy (ZPE) and entropy between the adsorbed state  $\text{H}^*$  and the gas phase  $\text{H}_2$ ,  
 25 respectively. Gibbs free energy correction was made by using VASPKIT.<sup>15</sup>

26  
 27

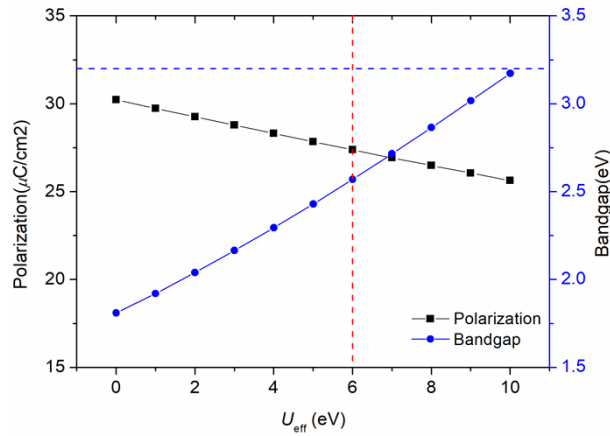

1 **Figure S1** The evolution of polarization and bandgap with  $U_{\text{eff}}$  for bulk BTO. The blue  
 2 dashed line refers to the experimental bandgap of 3.2eV.

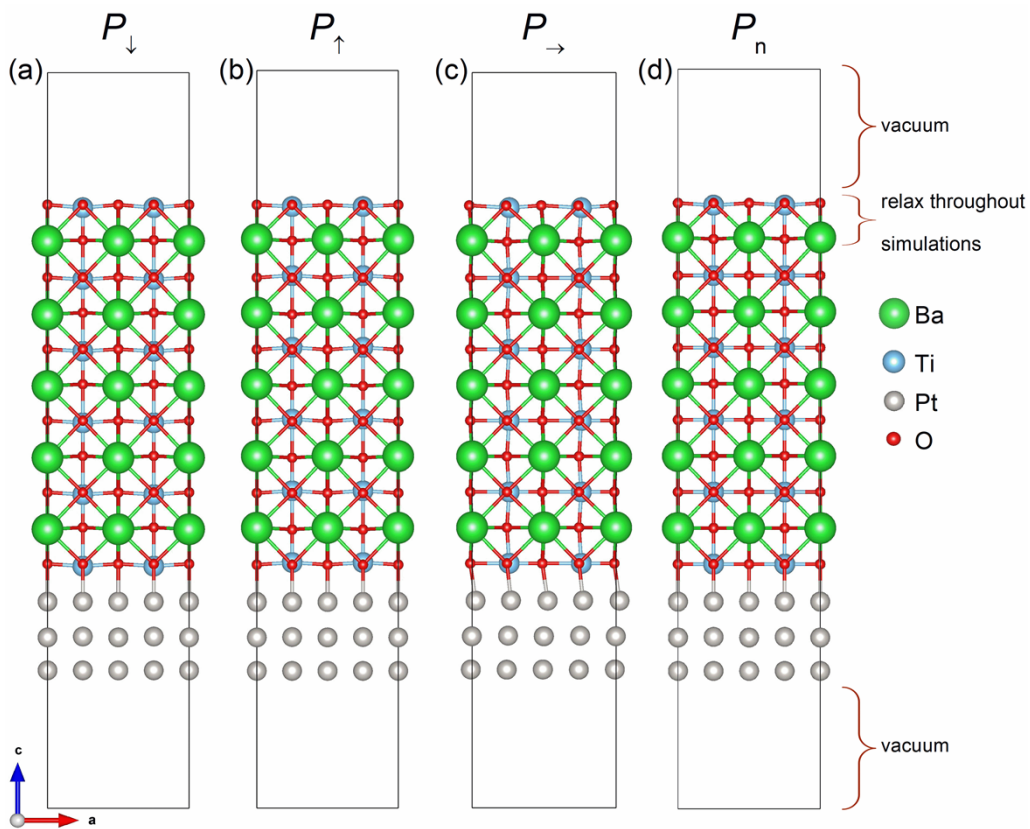

3 **Figure S2** The sideview of whole BTO slab model after surface relaxation under varied  
 4 polarization state: (a) the downward polarization state, (b) upward polarization state,  
 5 (c) the rightward in-plane polarization state, and (d) the non-polar state. The three layers  
 6 of platinum atoms are introduced at the bottom of the BTO slab model in order to  
 7 passivate the dangling bonds of the lower BTO surface and act as an electron reservoir.

8  
 9  
 10  
 11

1

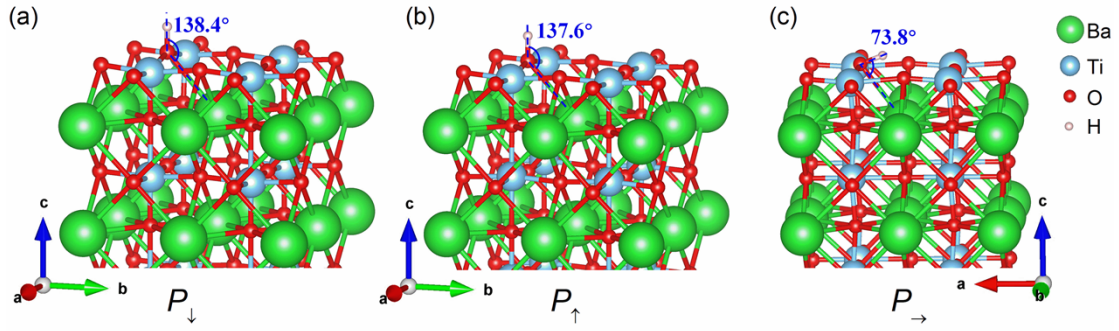

2

3 **Figure S3** The Ba-O-H angle between OH dipole and neighboring Ba-O bond under  
 4 various polarization states. Herein, only upper four atomic layers of BTO slabs are  
 5 shown for simplicity.

6

7 **Table S1** The Gibbs free energy change of hydrogen adsorption and hydrogen  
 8 adsorption energy on BTO with topmost two layers relaxed under various polarization  
 9 states.

| Polarization state | Initial hydrogen adsorption configuration | $\Delta G_{\text{H}^*} / \text{eV}$ | $E_{\text{ads}} / \text{eV}$ | Final hydrogen adsorption configuration |                                                                                       |
|--------------------|-------------------------------------------|-------------------------------------|------------------------------|-----------------------------------------|---------------------------------------------------------------------------------------|
| $P_{\downarrow}$   | 1-Ti-Top                                  | 2.7366                              | 2.6472                       | 1-Ti-Top                                | 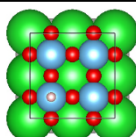 |
|                    | 2-O-Top                                   | -1.4939                             | -1.7936                      | 2-O-Top                                 |  |
|                    | 3-Ti-O-bri                                | <b>-1.5640</b>                      | <b>-1.8638</b>               | <b>2-O-Top</b>                          |  |
|                    | 4-hollow                                  | 0.6491                              | 0.5507                       | 4-hollow                                |  |
| $P_{\uparrow}$     | 1-Ti-Top                                  | 0.8575                              | 0.6774                       | 1-Ti-top                                |  |
|                    | 2-O-Top                                   | <b>0.2820</b>                       | <b>-0.0167</b>               | <b>2-O-top</b>                          |  |
|                    | 3-Ti-O-bri                                | 0.6288                              | 0.4481                       | 1-Ti-quasi-top                          |  |

|                   |                          |                |                |                           |                                                                                       |
|-------------------|--------------------------|----------------|----------------|---------------------------|---------------------------------------------------------------------------------------|
|                   | 4-hollow                 | 0.4513         | 0.2702         | 1-Ti-quasi-top            | 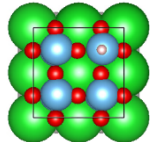   |
| $P_{\rightarrow}$ | 1-Ti-Top                 | 2.3597         | 2.2153         | Ti-quasi-top              |    |
|                   | 2-O(high)-Top            | 0.2118         | -0.0880        | O-quasi-top               |    |
|                   | 3-Ti-O(low)-bri          | <b>-0.2208</b> | <b>-0.5525</b> | <b>O(low)-hollow-left</b> |    |
|                   | 4-hollow                 | -0.2082        | -0.5403        | O(low)-hollow-left        |    |
|                   | 5-O(low)-Top             | -0.1927        | -0.5249        | O(low)-hollow-left        |   |
|                   | 6-Ti-O(high)-bri-left    | 0.2115         | -0.0882        | O-quasi-top               |  |
|                   | <i>7L-O(low)-hollow</i>  | -0.2082        | -0.5403        | O(low)-hollow-left        |  |
|                   | <i>7R-O(low)-hollow</i>  | -0.0392        | -0.3715        | O(low)-hollow-right       |  |
|                   | <i>8U-O(high)-hollow</i> | -0.1974        | -0.5290        | O(high)-hollow-upside     |  |
|                   | <i>8D-O(high)-hollow</i> | -0.1969        | -0.5288        | O(high)-hollow-downside   |  |
|                   | 9-Ti-O(high)-bri-right   | 0.2124         | -0.0876        | O-quasi-top               |  |

|       |            |                |                |                |                                                                                     |
|-------|------------|----------------|----------------|----------------|-------------------------------------------------------------------------------------|
| $P_n$ | 1-Ti-Top   | 2.3230         | 2.1471         | 1-Ti-Top       | 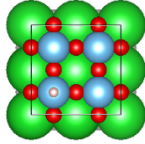 |
|       | 2-O-Top    | -0.0023        | -0.3020        | 2-O-Top        |  |
|       | 3-Ti-O-bri | <b>-0.0780</b> | <b>-0.3776</b> | <b>2-O-Top</b> |  |
|       | 4-hollow   | 2.11           | 2.0106         | 4-hollow       |  |

1  $L, R, U, D$  refers to left, right, upside, downside, respectively. The initial adsorption  
2 sites 1, 2, 3, 4, ..., 9 are indicated in Fig. 3a. The most stable configuration and  
3 corresponding energy values are indicated in bold fonts.

4

5

6

7

8

9 **Table S2** A comparison of structural and electronic properties and free energies for the  
10 case in presence of surface reconstruction ( $P$ ) and the one in absence (denoted as  $P_0$ )  
11 under varied polarization states. (Partial data are extracted from **Figure 2**)

| BT<br>O             | Surface/subsurface<br>Rumpling (%) | Surface<br>expansion/<br>Contraction<br>(%) | Vertical<br>polarization<br>change <sup>a</sup> ( $\mu\text{C}/\text{m}^2$ ) | $\Delta G_{\text{H}^*}$<br>/eV | $\Delta(\Delta G_{\text{H}^*})^a$<br>/eV |
|---------------------|------------------------------------|---------------------------------------------|------------------------------------------------------------------------------|--------------------------------|------------------------------------------|
| $P_{\downarrow}$    | -132 / -4                          | +0.97                                       | +6.2 (+23%)                                                                  | -1.56                          | -0.90                                    |
| $P_{\uparrow}$      | -59 / +93                          | -1.22                                       | -3.8 (-14%)                                                                  | 0.28                           | -0.08                                    |
| $P_{\rightarrow}$   | -93, -101 / +81                    | +0.34                                       | +3.1(+11%)                                                                   | -0.22                          | -1.05                                    |
| $P_0_{\downarrow}$  | -100 / -100                        | 0                                           | 0                                                                            | -0.66                          | 0                                        |
| $P_0_{\uparrow}$    | +100 / +100                        | 0                                           | 0                                                                            | 0.36                           | 0                                        |
| $P_0_{\rightarrow}$ | +100 / +100                        | 0                                           | 0                                                                            | 0.83                           | 0                                        |

12

13 <sup>a</sup> change in  $\Delta G_{\text{H}^*}$  relative to the case in absence of surface reconstruction.

14 We compare the Gibbs free energy changes (**Table S3**) using different damping  
15 functions in the DFT-D3 method. The results show that the HER activity trend is  
16 unaffected by the damping functions and the Gibbs free energy changes are quite

1 comparable, which is also a reflection of the reliability of the DFT-D3 method.

2

3 **Table S3** Gibbs free energy changes of hydrogen adsorption ( $\Delta G_{H^*}$ ) of BTO under  
4 varied polarization states using different damping functions in the DFT-D3 method.

| BTO            | DFT-D3(0) <sup>a</sup> | DFT-D3(BJ) <sup>b</sup> |
|----------------|------------------------|-------------------------|
| $P\downarrow$  | -1.56 eV               | -1.49 eV                |
| $P\uparrow$    | +0.28 eV               | +0.28 eV                |
| $P\rightarrow$ | -0.22 eV               | -0.19 eV                |

5 <sup>a</sup> method of Grimme with zero-damping function

6 <sup>b</sup> method with Becke-Johnson damping function

7

8

9

10

11

12

13

14

### 15 **Evaluation of BTO stability for HER**

16 The catalytic stability is an important figure of merit for a good catalyst in experiments,  
17 especially for commercial applications.<sup>17</sup> Aqueous stability or electrochemical stability  
18 can often be reflected from the Pourbaix Diagram, where the stability is judged from  
19 thermodynamics and is computationally affordable.<sup>18,19</sup> So, to evaluate the  
20 electrochemical stability of polarized BaTiO<sub>3</sub>, we constructed its Pourbaix phase  
21 diagram via pymatgen,<sup>20</sup> as shown in Figure S4.

22 According to the Pourbaix phase diagram, for the tetragonal BTO phase with out-of-  
23 plane polarization, the TiO<sub>2</sub>-terminated surface should be more electrochemically  
24 stable than BaO-terminated one throughout the  $E$ -pH space for HER. On the contrary,  
25 BaO surface tends to be dissolved into electrolyte in the form of Ba<sup>2+</sup> and BaOH<sup>+</sup> in  
26 acid and strongly alkaline environment, respectively, implying electrochemical  
27 instability. The results are comparable with those reported by Nongnuch Artrith.<sup>21</sup> For  
28 the BTO phase



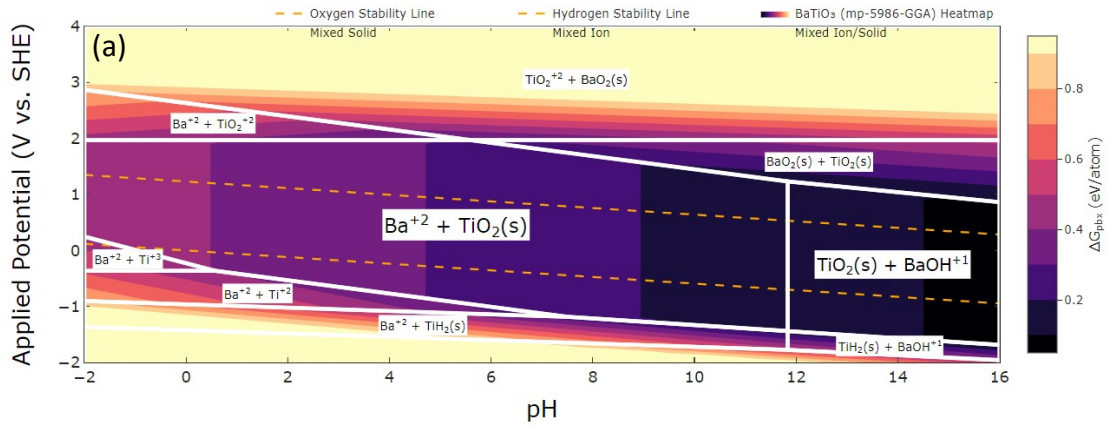

1

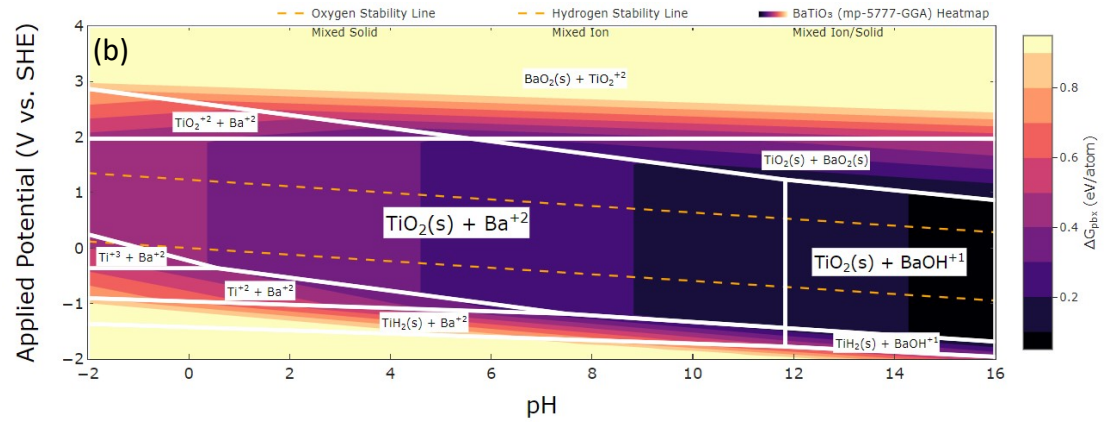

2

3 **Figure S4** Pourbaix phase diagram of BTO with (a) out-of-plane polarization and (b)  
4 in-plane polarization.

5

6 with in-plane polarization, the Pourbaix phase diagram remain almost the same as  
7 shown in Figure S5b.

8 In addition, we also evaluated the formation energy of surface Ti vacancy on BTO  
9 surface in presence of hydrogen adsorption to simulate the dissolution of Ti into  
10 electrolyte during catalysis, which is possible as shown in the region below hydrogen  
11 stability as shown in Figure S5 below. The vacancy formation energy is calculated  
12 according to the following equation:<sup>22</sup>

$$13 \quad E_f[X^q] = E_{tot}^{defect}[X,q] - E_{tot}^{perfect} - \sum n_i u_i - q[E_F + E_V + \Delta V]$$

14 where  $E_{tot}^{defect}[X,q]$  is the total energy of the  $\text{TiO}_2$ -terminated BTO surface slab with Ti

15 defect in the supercell,  $E_{tot}^{perfect}$  is the total energy of the perfect  $\text{TiO}_2$ -terminated BTO

16 surface slab,  $n_i$  denotes the total number of atoms of element  $i$  (for native host atoms Ti

17 removed from ( $n_i < 0$ ) or for foreign impurity atom added to ( $n_i > 0$ ) in the slab model,

18 and  $u_i$  refers to the chemical potential of element  $i$ . The value of  $u_{\text{Ti}}$  is the energy of an

19 individual Ti atom.  $E_F$  is the Fermi level with respect to the valence band maximum

1 (VBM) ( $E_V$ ), and  $\Delta V$  is the necessary correction for aligning the electrostatic potentials  
2 between the perfect surface and a surface with defects in a charged state. Herein, for  
3 simplicity, we mainly deal with the defective  $\text{TiO}_2$ -terminated BTO surface in a neutral  
4 charge state, thus the final term in the above equation will be zero and the equation is  
5 simplified as:

$$6 E_f[\text{Ti}] = E_{tot}^{defect}[\text{Ti}] - E_{tot}^{perfect} + u_{\text{Ti}}$$

7 In general, the more negative the formation energy value, the easier the formation  
8 process of vacancy with lower energy barrier. As shown in Figure S6, we find that the  
9 formation energy values under varied polarization state are all positive. This implies  
10 that it requires considerable energy barrier for Ti vacancy to form on BTO surface upon  
11 hydrogen adsorption, suggesting the thermodynamical surface stability of the  $\text{TiO}_2$ -  
12 terminated BTO surface in presence of hydrogen adsorption. It is noted that the BTO  
13 surface with upward and in-plane polarization shows higher formation energy value of  
14 Ti vacancy than that with downward polarization, indicating that the former  
15 polarization states could be more energetically stable during hydrogen adsorption.  
16 Therefore, the  $\text{TiO}_2$ -terminated surface in varied polarization states we choose in our  
17 study is assumed to ensure the electrochemical surface stability and long-term stability  
18 for HER, regardless of the polarization states involved.

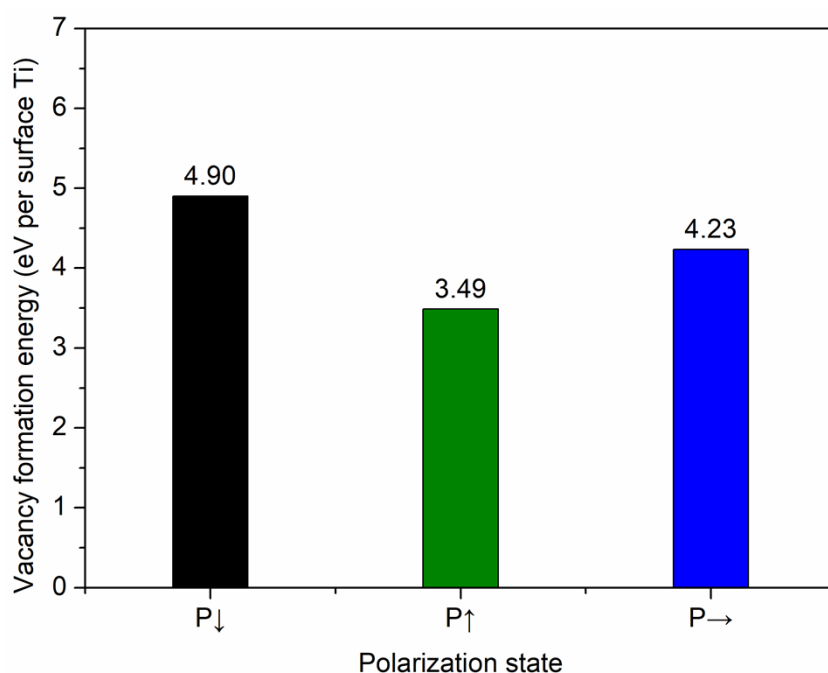

19

20 **Figure S5** Formation energies of a Ti vacancy on BTO surface with hydrogen  
21 absorption under varied polarization states.

## 1 References:

- 2 1 G. Kresse and J. Furthmüller, *Phys. Rev. B*, 1996, **54**, 11169–11186.
- 3 2 J. P. Perdew, K. Burke and M. Ernzerhof, *Phys. Rev. Lett.*, 1996, **77**, 3865–3868.
- 4 3 G. Kresse and D. Joubert, *Phys. Rev. B*, 1999, **59**, 1758–1775.
- 5 4 P. E. Blöchl, *Phys. Rev. B*, 1994, **50**, 17953–17979.
- 6 5 S. Grimme, J. Antony, S. Ehrlich and H. Krieg, *J. Chem. Phys.*, 2010, **132**, 154104.
- 7 6 H. J. Monkhorst and J. D. Pack, *Phys. Rev. B*, 1976, **13**, 5188–5192.
- 8 7 R. D. King-Smith and D. Vanderbilt, *Phys. Rev. B*, 1993, **47**, 1651–1654.
- 9 8 Y. Watanabe, *Sci. Rep.*, 2021, **11**, 2155.
- 10 9 Y. Watanabe, *Phys. Rev. Mater.*, 2020, **4**, 104405.
- 11 10 S. L. Dudarev, G. A. Botton, S. Y. Savrasov, C. J. Humphreys and A. P. Sutton,  
12 *Phys. Rev. B*, 1998, **57**, 1505–1509.
- 13 11 A. A. Peterson, F. Abild-Pedersen, F. Studt, J. Rossmeisl and J. K. Nørskov,  
14 *Energy Environ. Sci.*, 2010, **3**, 1311–1315.
- 15 12 J. K. Nørskov, J. Rossmeisl, A. Logadottir, L. Lindqvist, J. R. Kitchin, T. Bligaard  
16 and H. Jónsson, *J. Phys. Chem. B*, 2004, **108**, 17886–17892.
- 17 13 H. Prats and K. Chan, *Phys. Chem. Chem. Phys.*, 2021, **23**, 27150–27158.
- 18 14 R. Kronberg, M. Hakala, N. Holmberg and K. Laasonen, *Phys. Chem. Chem. Phys.*,  
19 2017, **19**, 16231–16241.
- 20 15 V. Wang, N. Xu, J.-C. Liu, G. Tang and W.-T. Geng, *Comput. Phys. Commun.*,  
21 2021, **267**, 108033.
- 22 16 P. Abbasi, M. R. Barone, M. de la Paz Cruz-Jáuregui, D. Valdespino-Padilla, H.  
23 Paik, T. Kim, L. Kornblum, D. G. Schlom, T. A. Pascal and D. P. Fenning, *Nano*  
24 *Lett.*, 2022, **22**, 4276–4284.
- 25 17 W. Zhai, Y. Ma, D. Chen, J. C. Ho, Z. Dai and Y. Qu, *InfoMat*, 2022, **4**, e12357.
- 26 18 A. M. Patel, J. K. Nørskov, K. A. Persson and J. H. Montoya, *Phys. Chem. Chem.*  
27 *Phys.*, 2019, **21**, 25323–25327.
- 28 19 A. K. Singh, L. Zhou, A. Shinde, S. K. Suram, J. H. Montoya, D. Winston, J. M.  
29 Gregoire and K. A. Persson, *Chem. Mater.*, 2017, **29**, 10159–10167.
- 30 20 S. P. Ong, W. D. Richards, A. Jain, G. Hautier, M. Kocher, S. Cholia, D. Gunter,  
31 V. L. Chevrier, K. A. Persson and G. Ceder, *Comput. Mater. Sci.*, 2013, **68**, 314–  
32 319.
- 33 21 N. Artrith, W. Sailuam, S. Limpijumnong and A. M. Kolpak, *Phys. Chem. Chem.*  
34 *Phys.*, 2016, **18**, 29561–29570.
- 35 22 C. G. Van de Walle and J. Neugebauer, *J. Appl. Phys.*, 2004, **95**, 3851–3879.
